# Supplementary material for: Rapid and Robust Multi-Phenotypic Assay System for ALS Using Human iPS Cells with Mutations in Causative Genes
Source: MDPI journal article supplement (doi:10.3390/ijms24086987), 2023-04-10
Supplement: s1 [file s1]

## Supplementary Table S1

### List of primers (related to Figure 1C)

| Gene       | Forward                  | Reverse                  |
|------------|--------------------------|--------------------------|
| ACTB       | CACCATTTGGCAATGAGCGGTTC  | AGGTCTTTGCGGATGTCCACGT   |
| HB9 (MNX1) | GTCCACCGCGGGCATGATCC     | TCTTCACCTGGGTCTCGGTGAGC  |
| CHAT       | GGAGGCGTGGAGCTCAGCGACACC | CGGGGAGCTCGCTGACGGAGTCTG |

## Supplementary Table S2

### List of antibodies (related to Figure1D, 1E, 2, 3, 5D, and 5E)

| Protein             | Species | Isotype      | Source (Cat no.)                | Dilution |
|---------------------|---------|--------------|---------------------------------|----------|
| $\beta$ III-TUBULIN | Mouse   | IgG2b        | Merck (T8660)                   | 1 : 1000 |
| HB9                 | Mouse   | IgG1         | DSHB (81.5C10)                  | 1 : 1000 |
| FUS                 | Rabbit  | (Polyclonal) | Bethyl Laboratories (A300-293A) | 1 : 1000 |
| G3BP                | Mouse   | IgG1         | BD Bioscience (611126)          | 1 : 500  |
| Misfolded SOD1      | Mouse   | IgG1         | MediMabs (B8H10)                | 1 : 100  |
