# Supplementary figures and images for: Rapid and Robust Multi-Phenotypic Assay System for ALS Using Human iPS Cells with Mutations in Causative Genes
Source: MDPI journal article supplement (doi:10.3390/ijms24086987), 2023-04-10

Supplementary Figure S1

Tubb3 / CHAT / Hoechst

NEUROG2

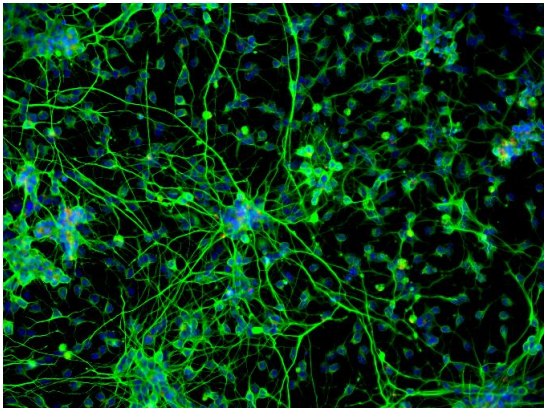

NEUROG2, LHX3, ISL1

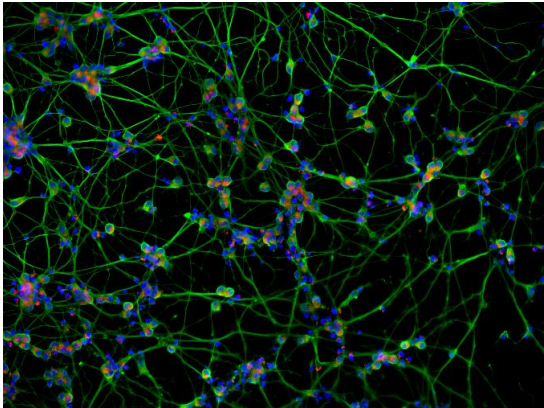

100 μm

# Supplementary Figure S2

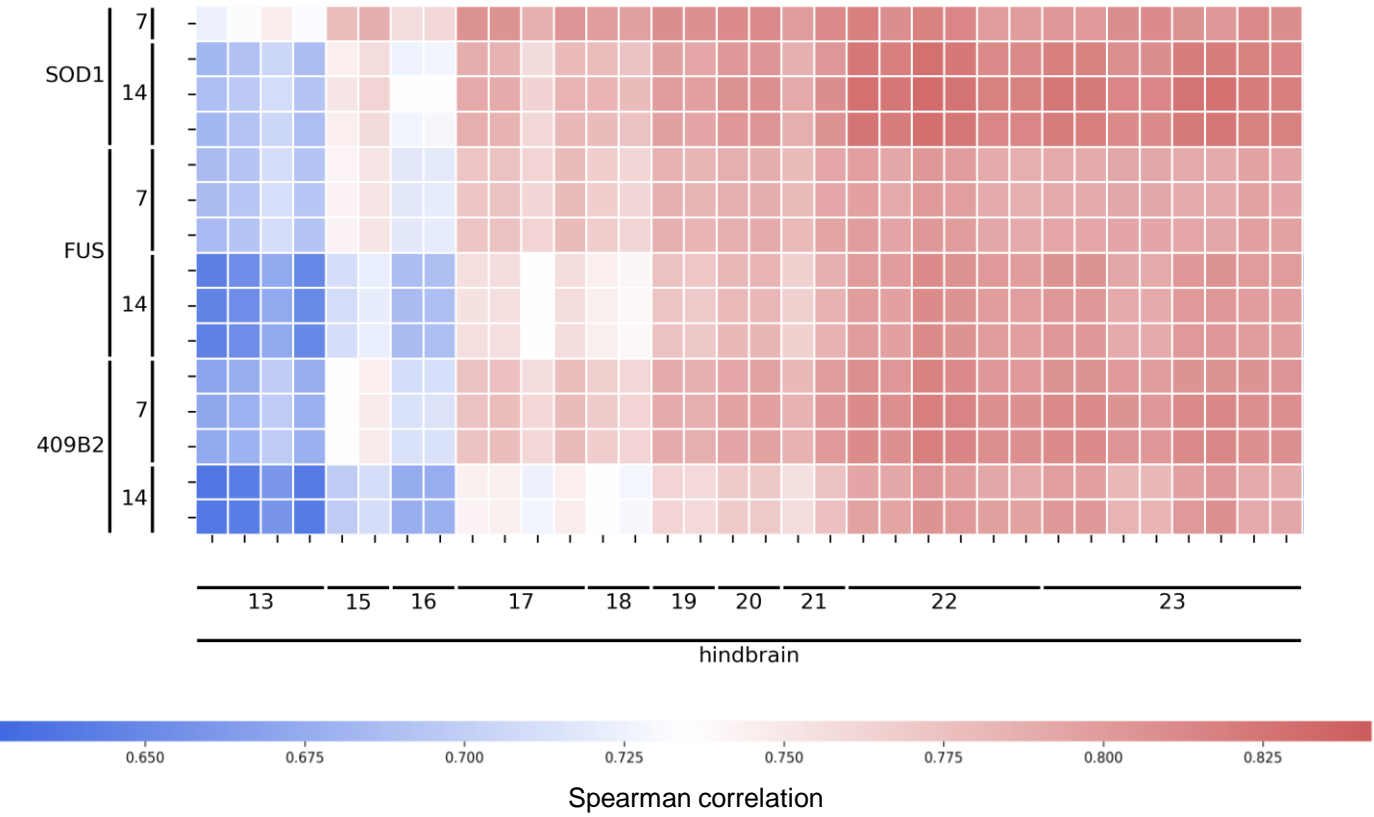

Supplement: s1 [file s1]
